# Supplementary material for: On the role of the termolecular reactions 2O2 + H2 → 2HO2 and 2O2 + H2 → H + HO2 + O2 in formation of the first radicals in hydrogen combustion: ab initio predictions of energy barriers
Source: Royal Society of Chemistry journal article supplement (doi:10.1039/c6cp07029a), 2017-01-01
Supplement: c6cp07029a1.pdf [file c6cp07029a1.pdf]

## SUPPORTING INFORMATION

**On the Role of the Termolecular Reactions  $2\text{O}_2 + \text{H}_2 \rightarrow 2\text{HO}_2$  and  
 $2\text{O}_2 + \text{H}_2 \rightarrow \text{H} + \text{HO}_2 + \text{O}_2$  in Formation of the First Radicals in Hydrogen Combustion:  
*Ab Initio* Predictions of Energy Barriers**

M. Monge-Palacios and Homayoon Rafatijo

The Z-matrix (distances in angstroms and angles in degrees) and the eigenvectors (mass weighted Cartesian coordinates), with the corresponding harmonic frequency ( $\text{cm}^{-1}$ ), of each stationary point are shown:

**SP1 (symmetric), CCSD=FC/cc-pVTZ:**

H

O 1 1.525

O 2 1.215 1 112.6

H 1 0.825 2 173.0 3 -4.688

O 4 1.525 1 172.9 2 -35.98

O 5 1.215 4 112.6 1 -6.537

| Atom         | Mode 12 (621i $\text{cm}^{-1}$ ) |       |       | Mode 11 (16 $\text{cm}^{-1}$ ) |       |       | Mode 10 (50 $\text{cm}^{-1}$ ) |       |       |
|--------------|----------------------------------|-------|-------|--------------------------------|-------|-------|--------------------------------|-------|-------|
|              | X                                | Y     | Z     | X                              | Y     | Z     | X                              | Y     | Z     |
| <b>1 (H)</b> | -0.47                            | -0.15 | -0.41 | 0.02                           | 0.12  | 0.00  | -0.50                          | -0.21 | -0.07 |
| <b>2 (O)</b> | 0.00                             | 0.00  | 0.28  | -0.01                          | 0.52  | 0.00  | -0.05                          | 0.07  | -0.06 |
| <b>3 (O)</b> | 0.00                             | 0.00  | 0.00  | -0.02                          | -0.46 | 0.01  | 0.10                           | 0.06  | -0.42 |
| <b>4 (H)</b> | -0.51                            | -0.27 | 0.29  | 0.11                           | -0.08 | 0.01  | -0.48                          | -0.25 | -0.06 |
| <b>5 (O)</b> | 0.06                             | 0.02  | -0.28 | 0.37                           | -0.36 | 0.04  | 0.00                           | -0.09 | 0.05  |
| <b>6 (O)</b> | 0.00                             | 0.00  | 0.00  | -0.34                          | 0.30  | -0.06 | 0.02                           | -0.01 | 0.44  |

**Table 1. Eigenvectors and eigenvalues of the saddle point SP1.**

|       | Mode 9 (136 cm <sup>-1</sup> ) |       |       | Mode 8 (377 cm <sup>-1</sup> ) |       |       | Mode 7 (672 cm <sup>-1</sup> ) |       |       |
|-------|--------------------------------|-------|-------|--------------------------------|-------|-------|--------------------------------|-------|-------|
| Atom  | X                              | Y     | Z     | X                              | Y     | Z     | X                              | Y     | Z     |
| 1 (H) | 0.33                           | -0.57 | -0.12 | -0.09                          | 0.68  | -0.12 | 0.48                           | 0.50  | 0.09  |
| 2 (O) | 0.08                           | 0.08  | -0.12 | 0.07                           | -0.02 | -0.08 | -0.05                          | -0.01 | 0.08  |
| 3 (O) | -0.03                          | -0.01 | 0.14  | -0.01                          | 0.00  | 0.09  | 0.01                           | 0.00  | -0.05 |
| 4 (H) | 0.23                           | -0.62 | -0.14 | -0.41                          | 0.54  | -0.16 | 0.70                           | 0.02  | 0.06  |
| 5 (O) | -0.09                          | 0.01  | -0.14 | -0.01                          | -0.06 | -0.08 | -0.03                          | -0.03 | -0.09 |
| 6 (O) | 0.00                           | 0.00  | 0.14  | -0.02                          | 0.00  | 0.09  | 0.00                           | 0.00  | 0.06  |

Table 2. Eigenvectors and eigenvalues of the saddle point SP1.

|       | Mode 6 (967 cm <sup>-1</sup> ) |       |       | Mode 5 (1013 cm <sup>-1</sup> ) |       |       | Mode 4 (1135 cm <sup>-1</sup> ) |       |       |
|-------|--------------------------------|-------|-------|---------------------------------|-------|-------|---------------------------------|-------|-------|
| Atom  | X                              | Y     | Z     | X                               | Y     | Z     | X                               | Y     | Z     |
| 1 (H) | -0.41                          | 0.57  | -0.10 | 0.33                            | 0.12  | 0.61  | 0.61                            | 0.16  | -0.32 |
| 2 (O) | 0.03                           | -0.01 | -0.03 | -0.03                           | 0.00  | -0.04 | -0.01                           | 0.00  | 0.05  |
| 3 (O) | -0.01                          | 0.00  | 0.01  | 0.02                            | 0.00  | 0.00  | -0.01                           | 0.00  | -0.02 |
| 4 (H) | 0.13                           | -0.69 | 0.06  | -0.43                           | -0.22 | 0.51  | -0.45                           | -0.30 | -0.45 |
| 5 (O) | 0.01                           | 0.02  | 0.04  | 0.03                            | 0.02  | -0.03 | 0.00                            | 0.00  | 0.05  |
| 6 (O) | -0.01                          | -0.01 | -0.01 | -0.01                           | -0.01 | 0.00  | 0.01                            | 0.01  | -0.02 |

Table 3. Eigenvectors and eigenvalues of the saddle point SP1.

|       | Mode 3 (1296 cm <sup>-1</sup> ) |       |       | Mode 2 (1458 cm <sup>-1</sup> ) |       |       | Mode 1 (2216 cm <sup>-1</sup> ) |       |       |
|-------|---------------------------------|-------|-------|---------------------------------|-------|-------|---------------------------------|-------|-------|
| Atom  | X                               | Y     | Z     | X                               | Y     | Z     | X                               | Y     | Z     |
| 1 (H) | 0.40                            | -0.04 | -0.48 | -0.01                           | 0.00  | -0.49 | -0.16                           | -0.01 | 0.68  |
| 2 (O) | 0.22                            | 0.00  | 0.00  | -0.33                           | 0.00  | -0.11 | 0.05                            | 0.00  | 0.05  |
| 3 (O) | -0.23                           | 0.00  | -0.10 | 0.34                            | 0.00  | 0.14  | -0.05                           | 0.00  | -0.02 |
| 4 (H) | 0.14                            | 0.27  | 0.54  | 0.11                            | 0.06  | -0.48 | 0.03                            | -0.04 | -0.70 |
| 5 (O) | 0.14                            | 0.16  | 0.04  | 0.24                            | 0.25  | -0.04 | 0.04                            | 0.04  | -0.03 |
| 6 (O) | -0.17                           | -0.18 | 0.05  | -0.25                           | -0.26 | 0.07  | -0.04                           | -0.04 | 0.01  |

**Table 4. Eigenvectors and eigenvalues of the saddle point SP1.**

**SP2 (asymmetric), MP2/6-31G:**

H

O 1 1.520

O 2 1.240 1 117.2

H 1 2.314 2 175.6 3 -163.3

O 4 0.989 1 177.3 2 0.738

O 5 1.381 4 106.3 1 102.0

|       | Mode 12 (2096i cm <sup>-1</sup> ) |      |       | Mode 11 (9 cm <sup>-1</sup> ) |       |       | Mode 10 (20 cm <sup>-1</sup> ) |       |       |
|-------|-----------------------------------|------|-------|-------------------------------|-------|-------|--------------------------------|-------|-------|
| Atom  | X                                 | Y    | Z     | X                             | Y     | Z     | X                              | Y     | Z     |
| 1 (H) | 0.11                              | 0.00 | 0.99  | 0.14                          | 0.26  | 0.02  | -0.43                          | -0.26 | -0.11 |
| 2 (O) | -0.06                             | 0.00 | -0.08 | 0.01                          | 0.50  | 0.02  | -0.08                          | 0.15  | -0.12 |
| 3 (O) | 0.05                              | 0.00 | 0.02  | -0.03                         | -0.47 | 0.11  | 0.05                           | 0.00  | -0.37 |
| 4 (H) | 0.00                              | 0.00 | -0.01 | 0.32                          | -0.04 | -0.02 | -0.28                          | -0.42 | 0.01  |
| 5 (O) | 0.00                              | 0.00 | 0.00  | 0.35                          | -0.19 | -0.03 | 0.03                           | -0.15 | -0.02 |
| 6 (O) | 0.00                              | 0.00 | 0.00  | -0.36                         | 0.15  | -0.09 | 0.05                           | 0.04  | 0.52  |

**Table 5. Eigenvectors and eigenvalues of the saddle point SP2.**

|       | Mode 9 (40 cm <sup>-1</sup> ) |       |       | Mode 8 (57 cm <sup>-1</sup> ) |       |       | Mode 7 (99 cm <sup>-1</sup> ) |       |       |
|-------|-------------------------------|-------|-------|-------------------------------|-------|-------|-------------------------------|-------|-------|
| Atom  | X                             | Y     | Z     | X                             | Y     | Z     | X                             | Y     | Z     |
| 1 (H) | 0.65                          | -0.41 | -0.17 | -0.44                         | -0.29 | 0.33  | 0.09                          | 0.93  | -0.02 |
| 2 (O) | 0.12                          | 0.05  | -0.17 | -0.05                         | 0.01  | 0.34  | 0.02                          | -0.03 | -0.02 |
| 3 (O) | -0.08                         | 0.00  | 0.21  | 0.10                          | 0.00  | 0.05  | -0.01                         | 0.00  | 0.03  |
| 4 (H) | 0.15                          | -0.41 | -0.19 | -0.33                         | -0.24 | -0.38 | -0.34                         | 0.09  | 0.00  |
| 5 (O) | -0.12                         | -0.01 | -0.15 | -0.04                         | -0.05 | -0.40 | 0.00                          | -0.03 | -0.05 |
| 6 (O) | 0.02                          | 0.01  | 0.13  | 0.04                          | 0.06  | 0.01  | 0.00                          | 0.00  | 0.04  |

**Table 6. Eigenvectors and eigenvalues of the saddle point SP2.**

|              | <b>Mode 6 (151 cm<sup>-1</sup>)</b> |          |          | <b>Mode 5 (771 cm<sup>-1</sup>)</b> |          |          | <b>Mode 4 (1361 cm<sup>-1</sup>)</b> |          |          |
|--------------|-------------------------------------|----------|----------|-------------------------------------|----------|----------|--------------------------------------|----------|----------|
| <b>Atom</b>  | <b>X</b>                            | <b>Y</b> | <b>Z</b> | <b>X</b>                            | <b>Y</b> | <b>Z</b> | <b>X</b>                             | <b>Y</b> | <b>Z</b> |
| <b>1 (H)</b> | -0.08                               | 0.37     | 0.02     | 0.99                                | 0.00     | -0.05    | 0.00                                 | 0.00     | 0.01     |
| <b>2 (O)</b> | -0.02                               | -0.01    | 0.03     | -0.07                               | 0.00     | 0.08     | 0.00                                 | 0.00     | 0.00     |
| <b>3 (O)</b> | 0.01                                | 0.00     | -0.02    | 0.01                                | 0.00     | -0.08    | 0.00                                 | 0.00     | 0.00     |
| <b>4 (H)</b> | 0.79                                | -0.46    | -0.12    | -0.01                               | 0.01     | 0.00     | -0.42                                | -0.73    | -0.03    |
| <b>5 (O)</b> | -0.03                               | 0.01     | 0.00     | 0.00                                | 0.00     | 0.00     | 0.19                                 | 0.35     | -0.07    |
| <b>6 (O)</b> | 0.00                                | 0.00     | 0.01     | 0.00                                | 0.00     | 0.00     | -0.16                                | -0.31    | 0.07     |

**Table 7. Eigenvectors and eigenvalues of the saddle point SP2.**

|              | <b>Mode 3 (1435 cm<sup>-1</sup>)</b> |          |          | <b>Mode 2 (1537 cm<sup>-1</sup>)</b> |          |          | <b>Mode 1 (3498 cm<sup>-1</sup>)</b> |          |          |
|--------------|--------------------------------------|----------|----------|--------------------------------------|----------|----------|--------------------------------------|----------|----------|
| <b>Atom</b>  | <b>X</b>                             | <b>Y</b> | <b>Z</b> | <b>X</b>                             | <b>Y</b> | <b>Z</b> | <b>X</b>                             | <b>Y</b> | <b>Z</b> |
| <b>1 (H)</b> | 0.00                                 | 0.00     | -0.01    | 0.06                                 | 0.00     | 0.85     | 0.00                                 | 0.00     | 0.00     |
| <b>2 (O)</b> | 0.00                                 | 0.00     | 0.00     | 0.34                                 | 0.00     | 0.13     | 0.00                                 | 0.00     | 0.00     |
| <b>3 (O)</b> | 0.00                                 | 0.00     | 0.00     | -0.34                                | 0.00     | -0.18    | 0.00                                 | 0.00     | 0.00     |
| <b>4 (H)</b> | 0.48                                 | 0.86     | -0.09    | 0.02                                 | 0.02     | 0.01     | -0.12                                | 0.04     | -0.99    |
| <b>5 (O)</b> | 0.01                                 | 0.03     | -0.07    | 0.00                                 | 0.00     | -0.01    | 0.01                                 | 0.00     | 0.06     |
| <b>6 (O)</b> | -0.04                                | -0.08    | 0.07     | 0.00                                 | 0.00     | 0.00     | 0.00                                 | 0.00     | 0.00     |

**Table 8. Eigenvectors and eigenvalues of the saddle point SP2.**

**SP3, MP2/6-31G:**

H

O 1 3.408

O 2 1.342 1 117.2

H 1 2.699 2 175.6 3 17.00

O 4 0.989 1 177.3 2 -32.39

O 5 1.382 4 106.3 1 102.0

|       | Mode 12 (5i cm <sup>-1</sup> ) |       |       | Mode 11 (4 cm <sup>-1</sup> ) |       |       | Mode 10 (6 cm <sup>-1</sup> ) |       |       |
|-------|--------------------------------|-------|-------|-------------------------------|-------|-------|-------------------------------|-------|-------|
| Atom  | X                              | Y     | Z     | X                             | Y     | Z     | X                             | Y     | Z     |
| 1 (H) | -0.67                          | 0.39  | -0.03 | -0.02                         | -0.86 | 0.07  | 0.69                          | 0.57  | -0.10 |
| 2 (O) | -0.04                          | 0.21  | -0.02 | 0.02                          | 0.19  | 0.08  | 0.10                          | 0.04  | -0.10 |
| 3 (O) | 0.05                           | -0.24 | -0.20 | 0.00                          | -0.10 | 0.12  | -0.08                         | -0.07 | 0.24  |
| 4 (H) | -0.35                          | 0.11  | -0.01 | -0.10                         | -0.30 | 0.05  | 0.01                          | 0.15  | -0.15 |
| 5 (O) | -0.16                          | 0.01  | 0.01  | -0.10                         | -0.06 | 0.05  | -0.14                         | 0.01  | -0.17 |
| 6 (O) | 0.22                           | -0.01 | 0.21  | 0.09                          | 0.04  | -0.25 | 0.07                          | -0.03 | 0.04  |

**Table 9. Eigenvectors and eigenvalues of the saddle point SP3.**

|       | Mode 9 (16 cm <sup>-1</sup> ) |       |       | Mode 8 (20 cm <sup>-1</sup> ) |       |       | Mode 7 (26 cm <sup>-1</sup> ) |       |       |
|-------|-------------------------------|-------|-------|-------------------------------|-------|-------|-------------------------------|-------|-------|
| Atom  | X                             | Y     | Z     | X                             | Y     | Z     | X                             | Y     | Z     |
| 1 (H) | -0.28                         | 0.81  | -0.05 | 0.96                          | -0.06 | 0.09  | 0.02                          | 0.91  | 0.11  |
| 2 (O) | -0.10                         | -0.01 | 0.36  | -0.07                         | 0.02  | 0.06  | 0.01                          | 0.00  | -0.05 |
| 3 (O) | 0.08                          | 0.01  | 0.01  | 0.02                          | -0.02 | -0.11 | -0.01                         | 0.00  | -0.01 |
| 4 (H) | -0.03                         | 0.06  | -0.23 | 0.20                          | 0.00  | 0.06  | 0.02                          | -0.28 | 0.18  |

|              |      |       |       |       |      |      |       |       |       |
|--------------|------|-------|-------|-------|------|------|-------|-------|-------|
| <b>5 (O)</b> | 0.02 | -0.01 | -0.22 | -0.04 | 0.00 | 0.03 | -0.01 | -0.06 | 0.17  |
| <b>6 (O)</b> | 0.01 | -0.04 | -0.13 | 0.01  | 0.01 | 0.01 | 0.01  | 0.02  | -0.13 |

**Table 10. Eigenvectors and eigenvalues of the saddle point SP3.**

|              | <b>Mode 6 (75 cm<sup>-1</sup>)</b> |          |          | <b>Mode 5 (118 cm<sup>-1</sup>)</b> |          |          | <b>Mode 4 (942 cm<sup>-1</sup>)</b> |          |          |
|--------------|------------------------------------|----------|----------|-------------------------------------|----------|----------|-------------------------------------|----------|----------|
| <b>Atom</b>  | <b>X</b>                           | <b>Y</b> | <b>Z</b> | <b>X</b>                            | <b>Y</b> | <b>Z</b> | <b>X</b>                            | <b>Y</b> | <b>Z</b> |
| <b>1 (H)</b> | -0.23                              | -0.01    | -0.01    | -0.05                               | 0.00     | 1.00     | 0.00                                | 0.00     | 0.00     |
| <b>2 (O)</b> | 0.00                               | 0.01     | 0.00     | 0.00                                | 0.00     | -0.02    | 0.63                                | 0.00     | 0.32     |
| <b>3 (O)</b> | 0.00                               | -0.01    | 0.00     | 0.00                                | 0.00     | 0.00     | -0.63                               | 0.00     | -0.32    |
| <b>4 (H)</b> | 0.96                               | 0.06     | 0.11     | 0.00                                | 0.03     | -0.04    | 0.01                                | 0.00     | 0.00     |
| <b>5 (O)</b> | -0.05                              | 0.00     | -0.01    | 0.00                                | 0.00     | -0.04    | 0.00                                | 0.00     | 0.00     |
| <b>6 (O)</b> | 0.00                               | 0.00     | 0.00     | 0.00                                | -0.01    | 0.00     | 0.00                                | 0.00     | 0.00     |

**Table 11. Eigenvectors and eigenvalues of the saddle point SP3.**

|              | <b>Mode 3 (1359 cm<sup>-1</sup>)</b> |          |          | <b>Mode 2 (1431 cm<sup>-1</sup>)</b> |          |          | <b>Mode 1 (3511 cm<sup>-1</sup>)</b> |          |          |
|--------------|--------------------------------------|----------|----------|--------------------------------------|----------|----------|--------------------------------------|----------|----------|
| <b>Atom</b>  | <b>X</b>                             | <b>Y</b> | <b>Z</b> | <b>X</b>                             | <b>Y</b> | <b>Z</b> | <b>X</b>                             | <b>Y</b> | <b>Z</b> |
| <b>1 (H)</b> | 0.00                                 | 0.00     | 0.00     | 0.00                                 | 0.00     | 0.00     | 0.00                                 | 0.00     | 0.00     |
| <b>2 (O)</b> | 0.00                                 | 0.00     | 0.00     | 0.00                                 | 0.00     | 0.00     | 0.00                                 | 0.00     | 0.00     |
| <b>3 (O)</b> | 0.00                                 | 0.00     | 0.00     | 0.00                                 | 0.00     | 0.00     | 0.00                                 | 0.00     | 0.00     |
| <b>4 (H)</b> | 0.04                                 | -0.85    | 0.07     | -0.07                                | 0.99     | 0.05     | 0.12                                 | -0.01    | -0.99    |
| <b>5 (O)</b> | -0.03                                | 0.39     | 0.05     | -0.01                                | 0.03     | 0.07     | -0.01                                | 0.00     | 0.06     |
| <b>6 (O)</b> | 0.03                                 | -0.34    | -0.05    | 0.01                                 | -0.09    | -0.07    | 0.00                                 | 0.00     | 0.00     |

**Table 12. Eigenvectors and eigenvalues of the saddle point SP3.**

**Complex-1, CCSD=FC/cc-pVTZ:**

H

O 1 0.981

O 2 1.322 1 103.2

O 1 1.842 2 151.4 3 0.042

O 4 1.322 1 105.4 2 -0.034

H 5 0.981 4 103.2 1 -0.022

|              | Mode 12 (106 cm <sup>-1</sup> ) |       |      | Mode 11 (205 cm <sup>-1</sup> ) |      |       | Mode 10 (255 cm <sup>-1</sup> ) |      |       |
|--------------|---------------------------------|-------|------|---------------------------------|------|-------|---------------------------------|------|-------|
| Atom         | X                               | Y     | Z    | X                               | Y    | Z     | X                               | Y    | Z     |
| <b>1 (H)</b> | 0.00                            | 0.18  | 0.00 | -0.33                           | 0.00 | 0.40  | 0.46                            | 0.00 | -0.12 |
| <b>2 (O)</b> | 0.00                            | 0.48  | 0.00 | -0.18                           | 0.00 | 0.38  | 0.16                            | 0.00 | -0.11 |
| <b>3 (O)</b> | 0.00                            | -0.49 | 0.00 | -0.13                           | 0.00 | 0.18  | 0.03                            | 0.00 | 0.49  |
| <b>4 (O)</b> | 0.00                            | -0.49 | 0.00 | 0.13                            | 0.00 | -0.18 | -0.03                           | 0.00 | -0.49 |
| <b>5 (O)</b> | 0.00                            | 0.48  | 0.00 | 0.18                            | 0.00 | -0.38 | -0.16                           | 0.00 | 0.11  |
| <b>6 (H)</b> | 0.00                            | 0.18  | 0.00 | 0.33                            | 0.00 | -0.40 | -0.46                           | 0.00 | 0.12  |

**Table 13. Eigenvectors and eigenvalues of the complex Complex-1.**

|              | Mode 9 (278 cm <sup>-1</sup> ) |      |      | Mode 8 (561 cm <sup>-1</sup> ) |       |      | Mode 7 (707 cm <sup>-1</sup> ) |       |      |
|--------------|--------------------------------|------|------|--------------------------------|-------|------|--------------------------------|-------|------|
| Atom         | X                              | Y    | Z    | X                              | Y     | Z    | X                              | Y     | Z    |
| <b>1 (H)</b> | -0.50                          | 0.00 | 0.28 | 0.00                           | 0.71  | 0.00 | 0.00                           | 0.71  | 0.00 |
| <b>2 (O)</b> | -0.05                          | 0.00 | 0.28 | 0.00                           | -0.03 | 0.00 | 0.00                           | -0.04 | 0.00 |

|              |       |      |       |      |       |      |      |       |      |
|--------------|-------|------|-------|------|-------|------|------|-------|------|
| <b>3 (O)</b> | 0.08  | 0.00 | -0.29 | 0.00 | -0.01 | 0.00 | 0.00 | 0.03  | 0.00 |
| <b>4 (O)</b> | 0.08  | 0.00 | -0.30 | 0.00 | -0.01 | 0.00 | 0.00 | -0.03 | 0.00 |
| <b>5 (O)</b> | -0.05 | 0.00 | 0.28  | 0.00 | -0.03 | 0.00 | 0.00 | 0.04  | 0.00 |
| <b>6 (H)</b> | -0.50 | 0.00 | 0.28  | 0.00 | 0.71  | 0.00 | 0.00 | -0.71 | 0.00 |

**Table 14. Eigenvectors and eigenvalues of the complex Complex-1.**

|              | <b>Mode 6 (1203 cm<sup>-1</sup>)</b> |          |          | <b>Mode 5 (1210 cm<sup>-1</sup>)</b> |          |          | <b>Mode 4 (1568 cm<sup>-1</sup>)</b> |          |          |
|--------------|--------------------------------------|----------|----------|--------------------------------------|----------|----------|--------------------------------------|----------|----------|
| <b>Atom</b>  | <b>X</b>                             | <b>Y</b> | <b>Z</b> | <b>X</b>                             | <b>Y</b> | <b>Z</b> | <b>X</b>                             | <b>Y</b> | <b>Z</b> |
| <b>1 (H)</b> | 0.21                                 | 0.00     | -0.09    | -0.22                                | 0.00     | 0.09     | -0.70                                | 0.00     | -0.03    |
| <b>2 (O)</b> | -0.47                                | 0.00     | -0.08    | 0.47                                 | 0.00     | 0.09     | 0.02                                 | 0.00     | -0.04    |
| <b>3 (O)</b> | 0.45                                 | 0.00     | 0.09     | -0.46                                | 0.00     | -0.09    | 0.03                                 | 0.00     | 0.04     |
| <b>4 (O)</b> | 0.46                                 | 0.00     | 0.09     | 0.45                                 | 0.00     | 0.09     | 0.03                                 | 0.00     | 0.04     |
| <b>5 (O)</b> | -0.48                                | 0.00     | -0.08    | -0.46                                | 0.00     | -0.09    | 0.02                                 | 0.00     | -0.04    |
| <b>6 (H)</b> | 0.22                                 | 0.00     | -0.09    | 0.21                                 | 0.00     | -0.09    | -0.70                                | 0.00     | -0.03    |

**Table 15. Eigenvectors and eigenvalues of the complex Complex-1.**

|              | <b>Mode 3 (1593 cm<sup>-1</sup>)</b> |          |          | <b>Mode 2 (3475 cm<sup>-1</sup>)</b> |          |          | <b>Mode 1 (3546 cm<sup>-1</sup>)</b> |          |          |
|--------------|--------------------------------------|----------|----------|--------------------------------------|----------|----------|--------------------------------------|----------|----------|
| <b>Atom</b>  | <b>X</b>                             | <b>Y</b> | <b>Z</b> | <b>X</b>                             | <b>Y</b> | <b>Z</b> | <b>X</b>                             | <b>Y</b> | <b>Z</b> |
| <b>1 (H)</b> | 0.70                                 | 0.00     | 0.02     | 0.02                                 | 0.00     | 0.71     | -0.01                                | 0.00     | -0.71    |
| <b>2 (O)</b> | -0.01                                | 0.00     | 0.03     | 0.00                                 | 0.00     | -0.05    | 0.00                                 | 0.00     | 0.04     |
| <b>3 (O)</b> | -0.02                                | 0.00     | -0.03    | 0.00                                 | 0.00     | 0.00     | 0.00                                 | 0.00     | 0.00     |
| <b>4 (O)</b> | 0.02                                 | 0.00     | 0.03     | 0.00                                 | 0.00     | 0.00     | 0.00                                 | 0.00     | 0.00     |
| <b>5 (O)</b> | 0.01                                 | 0.00     | -0.03    | 0.00                                 | 0.00     | 0.05     | 0.00                                 | 0.00     | 0.04     |
| <b>6 (H)</b> | -0.71                                | 0.00     | -0.02    | -0.02                                | 0.00     | -0.71    | -0.01                                | 0.00     | -0.71    |

**Table 16. Eigenvectors and eigenvalues of the complex Complex-1.**



**Complex-2, CCSD=FC/cc-pVTZ:**

H

O 1 0.973

O 2 1.327 1 103.8

O 1 1.914 2 173.2 3 14.44

O 4 1.322 1 103.5 2 413.0

H 5 0.970 4 104.3 1 184.7

| Atom  | Mode 12 (23 cm <sup>-1</sup> ) |       |       | Mode 11 (53 cm <sup>-1</sup> ) |       |       | Mode 10 (96 cm <sup>-1</sup> ) |       |       |
|-------|--------------------------------|-------|-------|--------------------------------|-------|-------|--------------------------------|-------|-------|
|       | X                              | Y     | Z     | X                              | Y     | Z     | X                              | Y     | Z     |
| 1 (H) | -0.20                          | 0.24  | -0.01 | 0.31                           | -0.02 | 0.07  | 0.41                           | 0.22  | -0.19 |
| 2 (O) | -0.03                          | 0.36  | -0.01 | 0.07                           | 0.25  | 0.07  | 0.12                           | -0.13 | -0.19 |
| 3 (O) | 0.03                           | -0.43 | -0.25 | -0.02                          | -0.05 | 0.41  | 0.01                           | 0.01  | 0.25  |
| 4 (O) | -0.37                          | -0.11 | -0.02 | -0.16                          | -0.20 | -0.05 | -0.13                          | 0.09  | -0.29 |
| 5 (O) | 0.36                           | 0.16  | 0.27  | 0.11                           | -0.01 | -0.40 | 0.00                           | 0.05  | 0.23  |
| 6 (H) | 0.30                           | 0.02  | 0.25  | -0.39                          | 0.12  | -0.50 | -0.39                          | -0.51 | 0.16  |

**Table 17. Eigenvectors and eigenvalues of the complex Complex-2.**

| Atom | Mode 9 (191 cm <sup>-1</sup> ) |   |   | Mode 8 (265 cm <sup>-1</sup> ) |   |   | Mode 7 (535 cm <sup>-1</sup> ) |   |   |
|------|--------------------------------|---|---|--------------------------------|---|---|--------------------------------|---|---|
|      | X                              | Y | Z | X                              | Y | Z | X                              | Y | Z |

|              |       |       |       |       |       |       |      |       |       |
|--------------|-------|-------|-------|-------|-------|-------|------|-------|-------|
| <b>1 (H)</b> | -0.34 | 0.06  | 0.37  | -0.09 | 0.14  | 0.07  | 0.00 | 0.99  | 0.00  |
| <b>2 (O)</b> | -0.05 | 0.00  | 0.37  | -0.04 | -0.01 | 0.07  | 0.00 | -0.03 | 0.00  |
| <b>3 (O)</b> | 0.04  | 0.00  | -0.01 | -0.01 | 0.00  | -0.05 | 0.00 | 0.00  | 0.00  |
| <b>4 (O)</b> | 0.01  | 0.04  | -0.37 | 0.04  | 0.01  | -0.01 | 0.00 | -0.02 | 0.02  |
| <b>5 (O)</b> | -0.02 | -0.04 | -0.01 | 0.06  | 0.01  | 0.00  | 0.00 | -0.01 | -0.02 |
| <b>6 (H)</b> | 0.66  | -0.07 | 0.12  | -0.88 | -0.37 | -0.18 | 0.11 | 0.09  | 0.00  |

**Table 18. Eigenvectors and eigenvalues of the complex Complex-2.**

|              | <b>Mode 6 (1186 cm<sup>-1</sup>)</b> |          |          | <b>Mode 5 (1190 cm<sup>-1</sup>)</b> |          |          | <b>Mode 4 (1475 cm<sup>-1</sup>)</b> |          |          |
|--------------|--------------------------------------|----------|----------|--------------------------------------|----------|----------|--------------------------------------|----------|----------|
| <b>Atom</b>  | <b>X</b>                             | <b>Y</b> | <b>Z</b> | <b>X</b>                             | <b>Y</b> | <b>Z</b> | <b>X</b>                             | <b>Y</b> | <b>Z</b> |
| <b>1 (H)</b> | -0.30                                | 0.00     | 0.13     | -0.03                                | -0.03    | 0.00     | -0.07                                | -0.02    | -0.01    |
| <b>2 (O)</b> | 0.66                                 | 0.00     | 0.14     | 0.03                                 | 0.00     | 0.01     | 0.00                                 | 0.00     | 0.00     |
| <b>3 (O)</b> | -0.64                                | 0.00     | -0.15    | -0.03                                | 0.00     | -0.01    | 0.00                                 | 0.00     | 0.00     |
| <b>4 (O)</b> | -0.01                                | 0.03     | 0.01     | 0.24                                 | -0.55    | -0.09    | 0.03                                 | -0.04    | -0.06    |
| <b>5 (O)</b> | 0.01                                 | -0.03    | 0.00     | -0.25                                | 0.58     | 0.07     | 0.00                                 | -0.02    | 0.06     |
| <b>6 (H)</b> | -0.02                                | 0.01     | -0.01    | 0.14                                 | -0.43    | 0.13     | -0.37                                | 0.92     | -0.01    |

**Table 19. Eigenvectors and eigenvalues of the complex Complex-2.**

|              | <b>Mode 3 (1542 cm<sup>-1</sup>)</b> |          |          | <b>Mode 2 (3649 cm<sup>-1</sup>)</b> |          |          | <b>Mode 1 (3716 cm<sup>-1</sup>)</b> |          |          |
|--------------|--------------------------------------|----------|----------|--------------------------------------|----------|----------|--------------------------------------|----------|----------|
| <b>Atom</b>  | <b>X</b>                             | <b>Y</b> | <b>Z</b> | <b>X</b>                             | <b>Y</b> | <b>Z</b> | <b>X</b>                             | <b>Y</b> | <b>Z</b> |
| <b>1 (H)</b> | 0.99                                 | -0.01    | 0.06     | -0.01                                | 0.00     | 1.00     | 0.00                                 | 0.00     | 0.07     |
| <b>2 (O)</b> | -0.03                                | 0.00     | 0.05     | 0.00                                 | 0.00     | -0.06    | 0.00                                 | 0.00     | 0.00     |
| <b>3 (O)</b> | -0.03                                | 0.00     | -0.05    | 0.00                                 | 0.00     | 0.00     | 0.00                                 | 0.00     | 0.00     |
| <b>4 (O)</b> | 0.00                                 | 0.00     | -0.01    | 0.00                                 | 0.00     | 0.00     | 0.00                                 | 0.00     | 0.00     |
| <b>5 (O)</b> | 0.00                                 | 0.00     | 0.00     | 0.00                                 | 0.00     | 0.00     | -0.01                                | 0.00     | 0.06     |
| <b>6 (H)</b> | 0.00                                 | 0.07     | 0.01     | -0.01                                | 0.00     | 0.07     | 0.19                                 | 0.01     | -0.98    |

**Table 20. Eigenvectors and eigenvalues of the complex Complex-2.**

**SP, CCSD=FC/cc-pVTZ:**

H

O 1 1.055

O 2 1.292 1 107.2

H 1 1.166 2 178.6 3 180.0

|              | Mode 6 (2077i cm <sup>-1</sup> ) |      |       | Mode 5 (357 cm <sup>-1</sup> ) |      |       | Mode 4 (723 cm <sup>-1</sup> ) |       |      |
|--------------|----------------------------------|------|-------|--------------------------------|------|-------|--------------------------------|-------|------|
| Atom         | X                                | Y    | Z     | X                              | Y    | Z     | X                              | Y     | Z    |
| <b>1 (H)</b> | 0.08                             | 0.00 | 0.82  | -0.09                          | 0.00 | 0.09  | 0.00                           | 0.90  | 0.00 |
| <b>2 (O)</b> | -0.05                            | 0.00 | -0.02 | -0.06                          | 0.00 | 0.09  | 0.00                           | -0.03 | 0.00 |
| <b>3 (O)</b> | 0.04                             | 0.00 | 0.01  | 0.00                           | 0.00 | -0.10 | 0.00                           | 0.00  | 0.00 |
| <b>4 (H)</b> | -0.01                            | 0.00 | -0.57 | 0.98                           | 0.00 | 0.10  | 0.00                           | -0.43 | 0.00 |

**Table 21. Eigenvectors and eigenvalues of the saddle point SP.**

|              | Mode 3 (1224 cm <sup>-1</sup> ) |      |       | Mode 2 (1413 cm <sup>-1</sup> ) |      |       | Mode 1 (1650 cm <sup>-1</sup> ) |      |       |
|--------------|---------------------------------|------|-------|---------------------------------|------|-------|---------------------------------|------|-------|
| Atom         | X                               | Y    | Z     | X                               | Y    | Z     | X                               | Y    | Z     |
| <b>1 (H)</b> | -0.39                           | 0.00 | -0.07 | 0.91                            | 0.00 | 0.25  | -0.47                           | 0.00 | 0.59  |
| <b>2 (O)</b> | 0.24                            | 0.00 | 0.11  | 0.04                            | 0.00 | 0.03  | 0.09                            | 0.00 | -0.08 |
| <b>3 (O)</b> | -0.22                           | 0.00 | -0.05 | -0.09                           | 0.00 | -0.07 | -0.06                           | 0.00 | 0.00  |

|              |      |      |       |       |      |      |      |      |      |
|--------------|------|------|-------|-------|------|------|------|------|------|
| <b>4 (H)</b> | 0.05 | 0.00 | -0.85 | -0.08 | 0.00 | 0.28 | 0.05 | 0.00 | 0.64 |
|--------------|------|------|-------|-------|------|------|------|------|------|

**Table 22. Eigenvectors and eigenvalues of the saddle point SP.**

**Complex-3, CCSD=FC/cc-pVTZ:**

H

O 1 2.930

O 2 1.201 1 127.4

H 1 0.743 2 171.5 3 -23.32

|              | <b>Mode 6 (2 cm<sup>-1</sup>)</b> |          |          | <b>Mode 5 (82 cm<sup>-1</sup>)</b> |          |          | <b>Mode 4 (133 cm<sup>-1</sup>)</b> |          |          |
|--------------|-----------------------------------|----------|----------|------------------------------------|----------|----------|-------------------------------------|----------|----------|
| <b>Atom</b>  | <b>X</b>                          | <b>Y</b> | <b>Z</b> | <b>X</b>                           | <b>Y</b> | <b>Z</b> | <b>X</b>                            | <b>Y</b> | <b>Z</b> |
| <b>1 (H)</b> | 0.34                              | -0.44    | -0.01    | 0.71                               | 0.08     | -0.04    | -0.05                               | 0.19     | 0.76     |
| <b>2 (O)</b> | 0.12                              | 0.21     | 0.00     | -0.07                              | -0.04    | 0.00     | -0.01                               | 0.00     | -0.01    |
| <b>3 (O)</b> | -0.17                             | -0.14    | 0.00     | -0.02                              | 0.02     | 0.00     | 0.00                                | 0.00     | 0.00     |
| <b>4 (H)</b> | 0.42                              | -0.64    | 0.01     | 0.63                               | 0.27     | 0.03     | 0.14                                | -0.13    | -0.59    |

**Table 23. Eigenvectors and eigenvalues of the complex Complex-3.**

|              | <b>Mode 3 (136 cm<sup>-1</sup>)</b> |          |          | <b>Mode 2 (1666 cm<sup>-1</sup>)</b> |          |          | <b>Mode 1 (4410 cm<sup>-1</sup>)</b> |          |          |
|--------------|-------------------------------------|----------|----------|--------------------------------------|----------|----------|--------------------------------------|----------|----------|
| <b>Atom</b>  | <b>X</b>                            | <b>Y</b> | <b>Z</b> | <b>X</b>                             | <b>Y</b> | <b>Z</b> | <b>X</b>                             | <b>Y</b> | <b>Z</b> |
| <b>1 (H)</b> | -0.18                               | 0.73     | -0.21    | 0.00                                 | 0.00     | 0.00     | 0.66                                 | 0.25     | 0.04     |

|              |       |       |      |       |       |      |       |       |       |
|--------------|-------|-------|------|-------|-------|------|-------|-------|-------|
| <b>2 (O)</b> | -0.01 | -0.01 | 0.01 | 0.55  | -0.45 | 0.00 | 0.00  | 0.00  | 0.00  |
| <b>3 (O)</b> | 0.00  | 0.00  | 0.00 | -0.55 | 0.45  | 0.00 | 0.00  | 0.00  | 0.00  |
| <b>4 (H)</b> | 0.28  | -0.53 | 0.16 | 0.00  | 0.00  | 0.00 | -0.66 | -0.25 | -0.04 |

**Table 24. Eigenvectors and eigenvalues of the complex Complex-3.**
